# Supplementary material
Source: publisher figshare collection journal article supplement (https://geolsoc.figshare.com/articles/dataset/_/3454271)
Supplement: Supplementary file 1 [file 1]

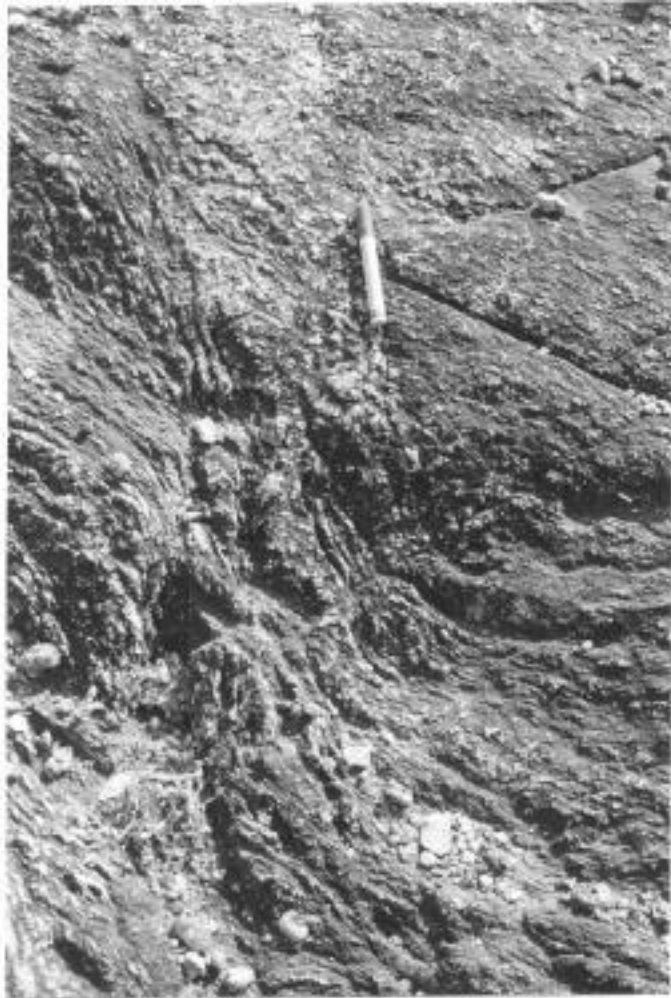

**Supplementary data-2:** Field photograph of high-strain zone at the contact between granite and gneiss. Camera faces ESE
