# Supplementary material
Source: publisher figshare collection journal article supplement (https://geolsoc.figshare.com/articles/dataset/_/3454271)
Supplement: Supplementary file 2 [file 1]

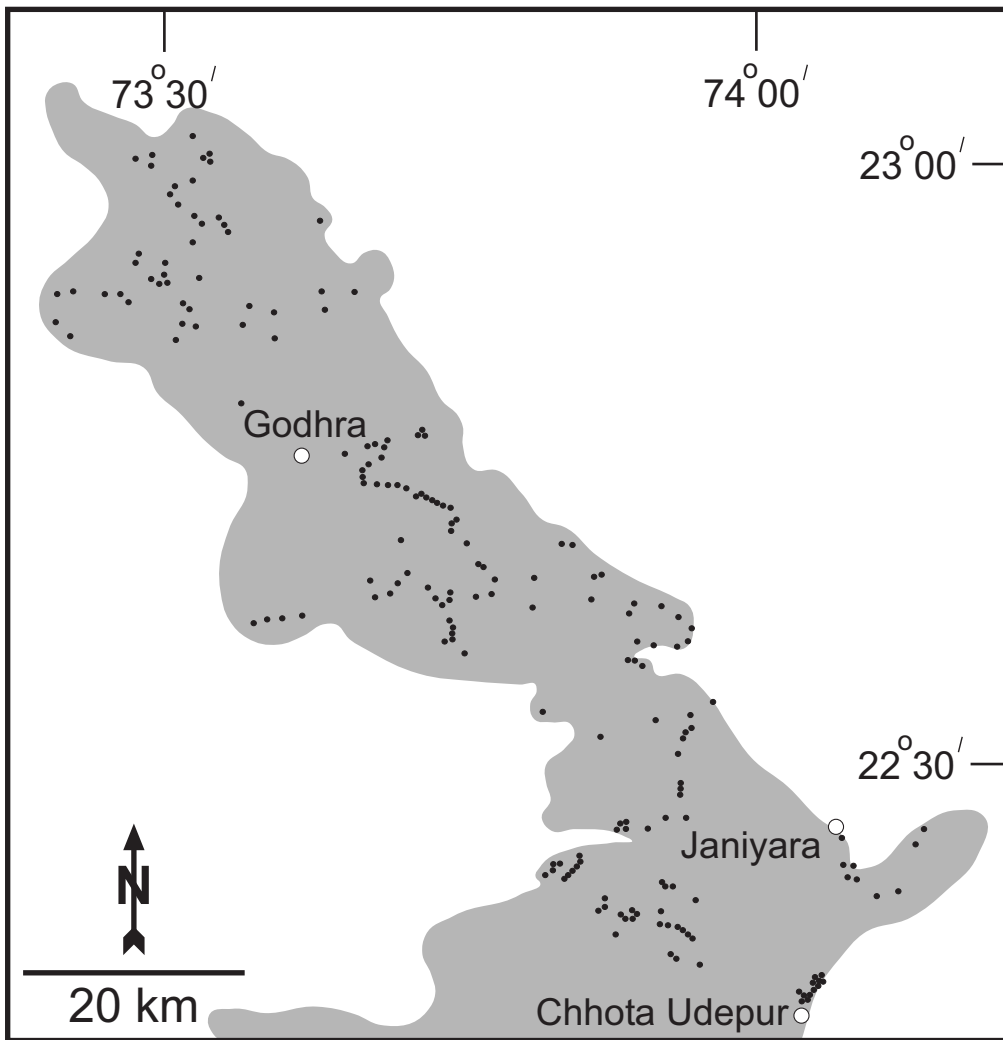

Supplementary data-1: Map showing locations of sites from where granite samples were taken. A total of 202 sites in the granite were sampled. On the present scale, closely located sites have not been shown.
